# Supplementary material for: The Existence of Airborne Mercury Nanoparticles
Source: PubMed Central journal article supplement (PMC6656720; doi:10.1038/s41598-019-47086-8), 2019-07-24
Supplement: 41598_2019_47086_MOESM1_ESM.pdf [file 41598_2019_47086_MOESM1_ESM.pdf]

# The Existence of Airborne Mercury Nanoparticles

Avik. J. Ghoshdastidar<sup>1</sup> & Parisa A. Ariya<sup>1, 2\*</sup>

<sup>1</sup>Department of Chemistry and <sup>2</sup>Department of Atmospheric and Oceanic Sciences

McGill University, 801 Sherbrooke St. W., Montreal, QC, Canada, H3A 2K6

\*Corresponding author: [parisa.ariya@mcgill.ca](mailto:parisa.ariya@mcgill.ca)

## Supplementary Information

### Tables

|           |                                                    |   |
|-----------|----------------------------------------------------|---|
| Table S1. | Summary of GOM and PBM speciation techniques.....  | 2 |
| Table S2. | Mercury mass spectrometry (Hg-MS) calibration..... | 4 |

### Figures

|            |                                                                                                                                                                                |   |
|------------|--------------------------------------------------------------------------------------------------------------------------------------------------------------------------------|---|
| Figure S1. | Mercuric Halides GOM and the contribution of mercury aerosols in Montreal's urban air. ....                                                                                    | 5 |
| Figure S2. | Mercuric Halides, NO <sub>x</sub> , SO <sub>2</sub> , humidity and temperature in Montreal.....                                                                                | 6 |
| Figure S3. | The vapour pressure of mercuric bromide and mercuric chloride <sup>4,14-18</sup> .....                                                                                         | 7 |
| Figure S4. | The experimental setup for the detection of gaseous and particulate mercuric halides with concurrent gaseous oxidized mercury and gaseous elemental mercury measurements ..... | 8 |

20 **Table S1. Summary of GOM and PBM speciation techniques**21 Expansion of Supplementary Table S1 in *Deeds et al. Anal (2015) Chem, 87, (10) 5109-5116*

| Reference                                | Sample Collection                                         | Sample Preparation                               | Detection Technique                         | Form of GOM/PBM Measured                                               |
|------------------------------------------|-----------------------------------------------------------|--------------------------------------------------|---------------------------------------------|------------------------------------------------------------------------|
| Braman and Johnson, 1974 <sup>1</sup>    | HCl treated – Chromosorb-W                                | Thermal Desorption                               | DC Discharge Emission Spectroscopy          | Gaseous Hg(II) type compounds                                          |
|                                          | NaOH treated – Chromosorb-W                               |                                                  |                                             | Gaseous Methylmercury (II) type compounds                              |
|                                          | Gold-coated glass beads                                   |                                                  |                                             | Gaseous Dimethylmercury                                                |
| Stratton and Lindberg, 1995 <sup>2</sup> | HCl Mist Chamber                                          | Stannous Chloride (SnCl <sub>2</sub> ) Reduction | Cold Vapor Atomic Fluorescence Spectroscopy | Reactive Gaseous Mercury <sup>a</sup>                                  |
| Sommar et al., 1997 <sup>3</sup>         | KCl Denuder                                               | Thermal Decomposition                            | Cold Vapor Atomic Fluorescence Spectroscopy | Divalent Gaseous Mercury                                               |
| Tong et al., 1999 <sup>4</sup>           | None                                                      | None                                             | Photo-fragment Fluorescence Spectroscopy    | Gaseous HgBr <sub>2</sub>                                              |
| Landis et al., 2002 <sup>5</sup>         | KCl Denuder                                               | Thermal Decomposition                            | Cold Vapor Atomic Fluorescence Spectroscopy | Reactive Gaseous Mercury <sup>b</sup>                                  |
| Olson et al., 2002 <sup>6</sup>          | 5% MnO <sub>2</sub> Alumina and Activated Carbon Sorbents | Thermal Desorption                               | Gas Chromatography – Mass Spectrometry      | Gaseous HgCl <sub>2</sub><br>Gaseous Hg(NO <sub>3</sub> ) <sub>2</sub> |
| Xiu et al. 2005 <sup>7</sup>             | Glass Fiber and Quartz Fiber Filter                       | Successive Digestions using Leaching Solutions   | Cold Vapor Atomic Absorption Spectroscopy   | Reactive PM<br>Volatile PM<br>Inert PM                                 |
| Xiu et al. 2009 <sup>8</sup>             | Glass Fibre Filter                                        | Successive Digestions using Leaching Solutions   | Cold Vapor Atomic Absorption Spectroscopy   | Exchangeable PM<br>HCl-soluble PM,<br>Elemental PM<br>Residual PM      |
| Lynam et al., 2010 <sup>9</sup>          | Polysulfone Cation-Exchange Membrane                      | Acid Digestion and Chemical Reduction            | Cold Vapor Atomic Fluorescence Spectroscopy | Gaseous Oxidized Mercury                                               |
| Huang et al. 2013 <sup>10</sup>          | Nylon Membrane                                            | Thermal Desorption                               | Cold Vapor Atomic Fluorescence Spectroscopy | Gaseous Oxidized Mercury                                               |

|                                      |                                                                                                 |                                                                      |                                                                  |                                                                                                        |
|--------------------------------------|-------------------------------------------------------------------------------------------------|----------------------------------------------------------------------|------------------------------------------------------------------|--------------------------------------------------------------------------------------------------------|
| Zverina et al.<br>2014 <sup>11</sup> | Fibrous Filters                                                                                 | Successive Extractions<br>using Leaching<br>Solutions                | Cold Vapor Atomic<br>Absorption<br>Spectroscopy                  | Water extractable<br>PM,<br>Acid-released PM,<br>Organic bound PM<br>Elemental and<br>complex-bound PM |
| Deeds et al,<br>2015 <sup>12</sup>   | Particle-based Sorbent<br>Trap                                                                  | Thermal Desorption                                                   | Atmospheric Pressure<br>Chemical Ionization<br>Mass Spectrometry | HgBr <sub>2</sub><br>HgCl <sub>2</sub>                                                                 |
| Jones et al.,<br>2016 <sup>13</sup>  | Nylon Membrane,<br>PDMS, quartz wool and<br>deactivated fused silica-<br>coated stainless steel | Thermal Desorption<br>with Cryogenic<br>preconcentration<br>focusing | Gas Chromatography –<br>Mass Spectrometry                        | HgBr <sub>2</sub><br>HgCl <sub>2</sub>                                                                 |

22

<sup>a</sup> Described as the “fraction of Hg reducible by SnCl<sub>2</sub>”

23

<sup>b</sup> Described as “water soluble (divalent) inorganic forms”

24 **Table S2. Mercury mass spectrometry (Hg-MS) calibration**

|         | HgCl <sub>2</sub> Detection<br>Limit (pg) | HgBr <sub>2</sub> Detection<br>Limit (pg) | Sensitivity –<br>HgCl <sub>2</sub> (cnts/pg) | Sensitivity –<br>HgBr <sub>2</sub> (cnts/pg) | R <sup>2</sup> – HgCl <sub>2</sub> | R <sup>2</sup> – HgBr <sub>2</sub> |
|---------|-------------------------------------------|-------------------------------------------|----------------------------------------------|----------------------------------------------|------------------------------------|------------------------------------|
| Trap 1  | 16                                        | 13                                        | 240                                          | 480                                          | 0.82                               | 0.88                               |
| Trap 2  | 69                                        | 61                                        | 275                                          | 565                                          | 0.91                               | 0.90                               |
| Trap 3  | 43                                        | 13                                        | 280                                          | 475                                          | 0.95                               | 0.83                               |
| Trap 4  | 39                                        | 21                                        | 600                                          | 805                                          | 0.93                               | 0.82                               |
| Trap 5  | 23                                        | 16                                        | 645                                          | 655                                          | 0.83                               | 0.91                               |
| Trap 6  | 34                                        | 26                                        | 390                                          | 675                                          | 0.90                               | 0.94                               |
| Trap 7  | 16                                        | 49                                        | 360                                          | 765                                          | 0.91                               | 0.95                               |
| Trap 8  | 9                                         | 7                                         | 320                                          | 650                                          | 0.96                               | 0.89                               |
| Trap 9  | 18                                        | 22                                        | 515                                          | 635                                          | 0.88                               | 0.85                               |
| Trap 10 | 13                                        | 13                                        | 375                                          | 810                                          | 0.83                               | 0.80                               |
| Trap 11 | 60                                        | 56                                        | 395                                          | 455                                          | 0.89                               | 0.91                               |
| Trap 12 | 15                                        | 27                                        | 470                                          | 875                                          | 0.92                               | 0.78                               |

25

26  
27

**Figure S1. Mercuric Halides GOM and the contribution of mercury aerosols in Montreal's urban air.**

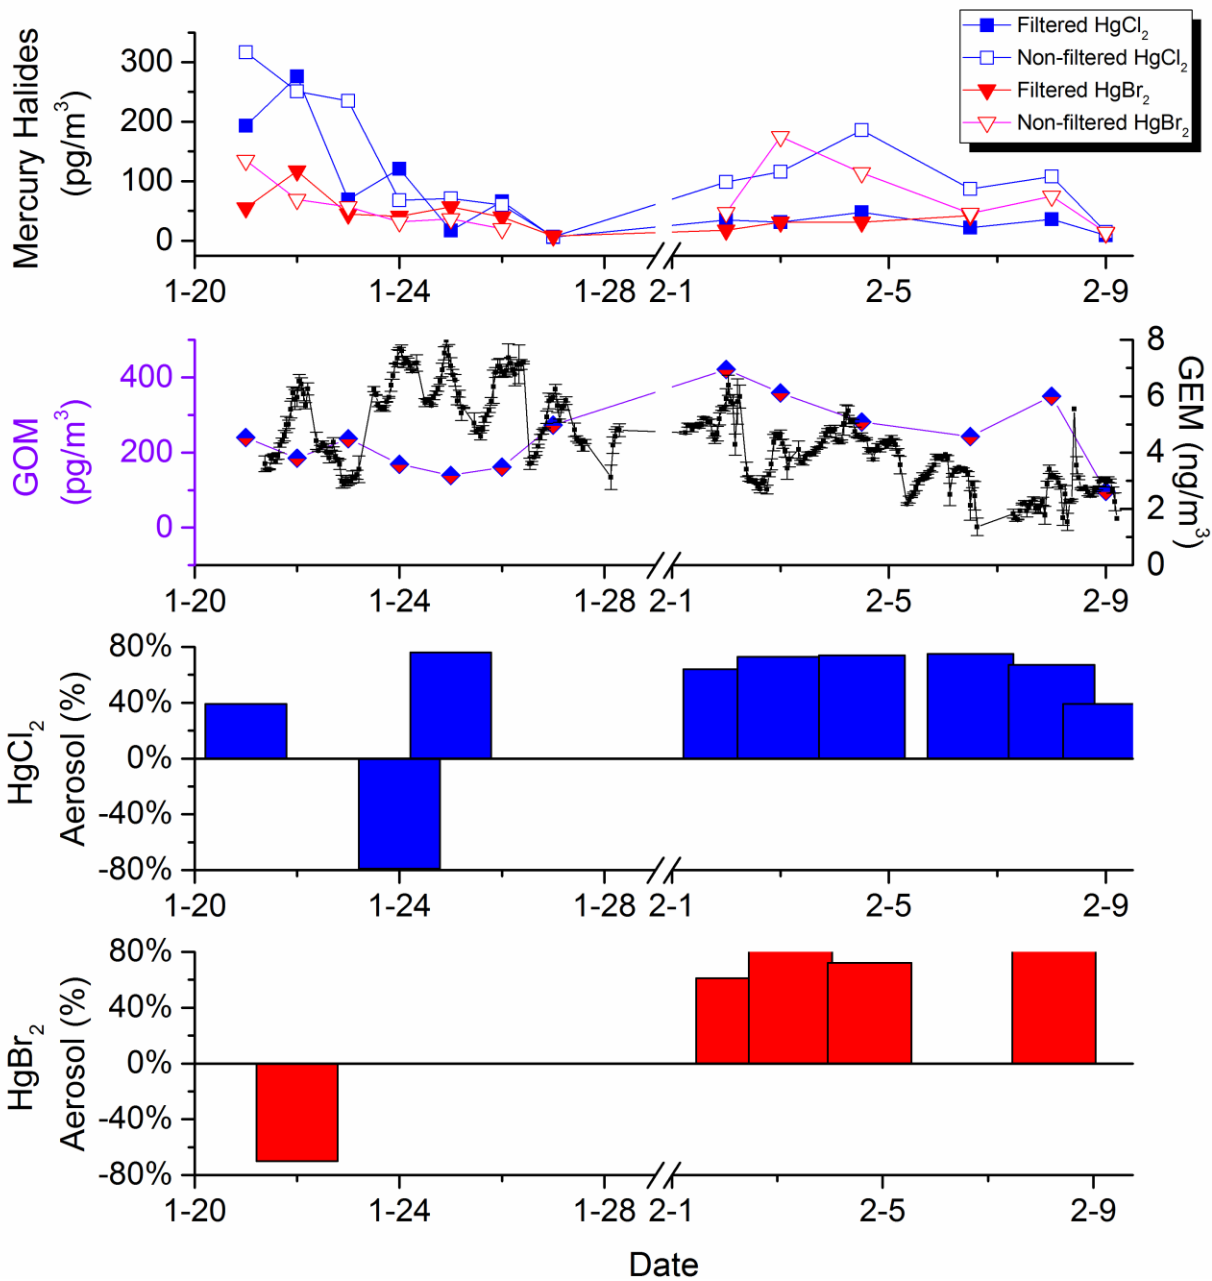

28

29 *Non-filtered and filtered mercuric halides concentrations by shredded PFA-Teflon preconcentration mercury*  
30 *mass spectrometry in Montreal urban. GOM measurements by KCl denuder and GEM measurements by CVAFS.*  
31 *The percentage of mercuric halide aerosols was estimated by the difference between the filtered and non-filtered*  
32 *mass spectrometry concentration averages where the difference was statistically significant.*

33 **Figure S2.** Mercuric Halides, NO<sub>x</sub>, SO<sub>2</sub>, humidity and temperature in Montreal.

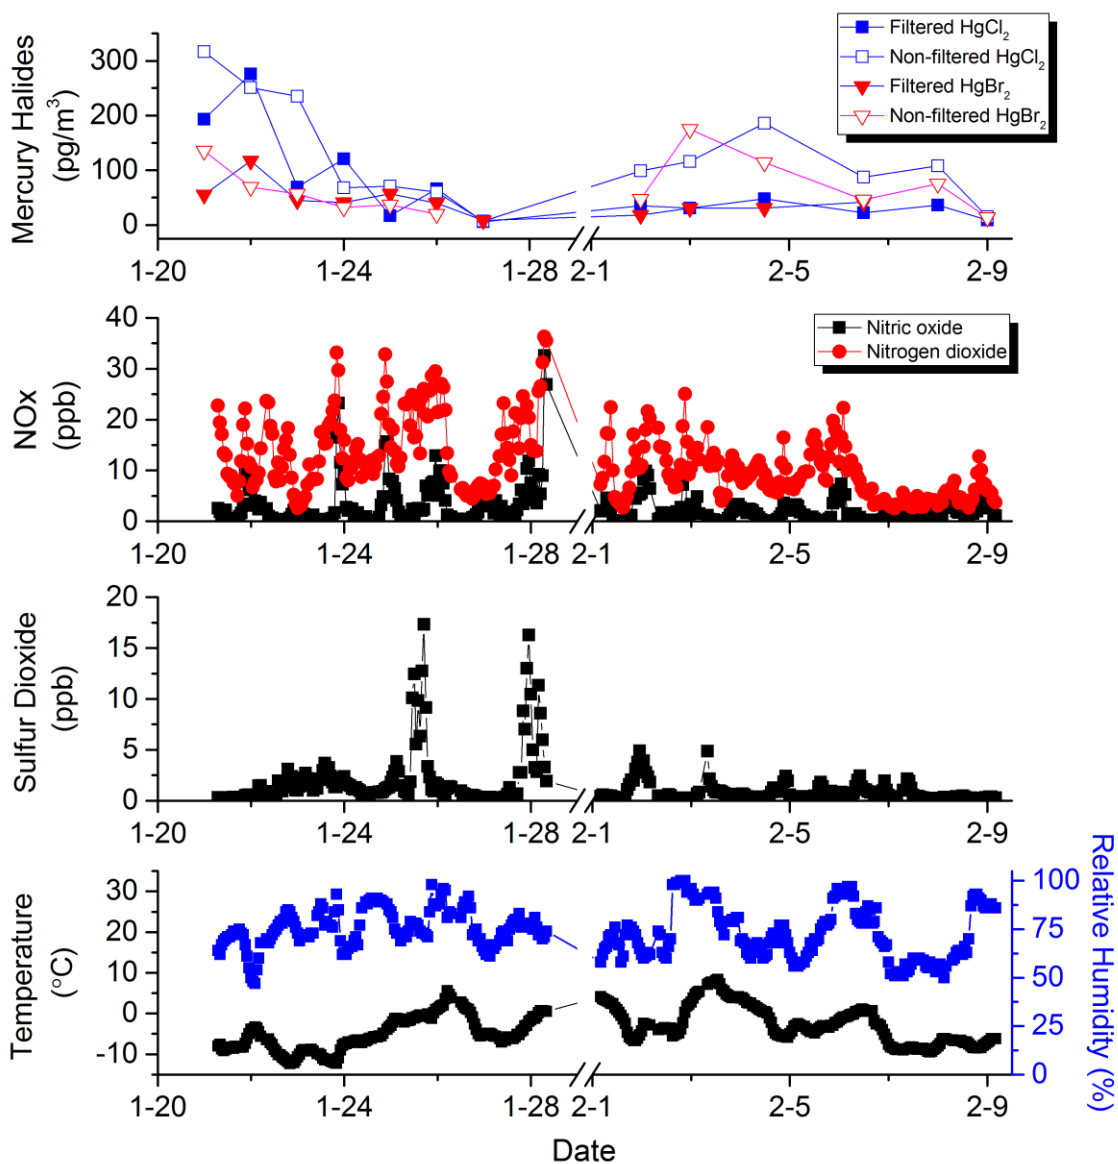

34

35 *Teflon preconcentration mercury mass spectrometry in Montreal urban air. NO<sub>x</sub>, sulphur dioxide, relative*  
36 *humidity and temperature measurements were taken 400 m away.*

37

38 **Figure S3.** The vapour pressure of mercuric bromide and mercuric chloride <sup>4,14-18</sup>

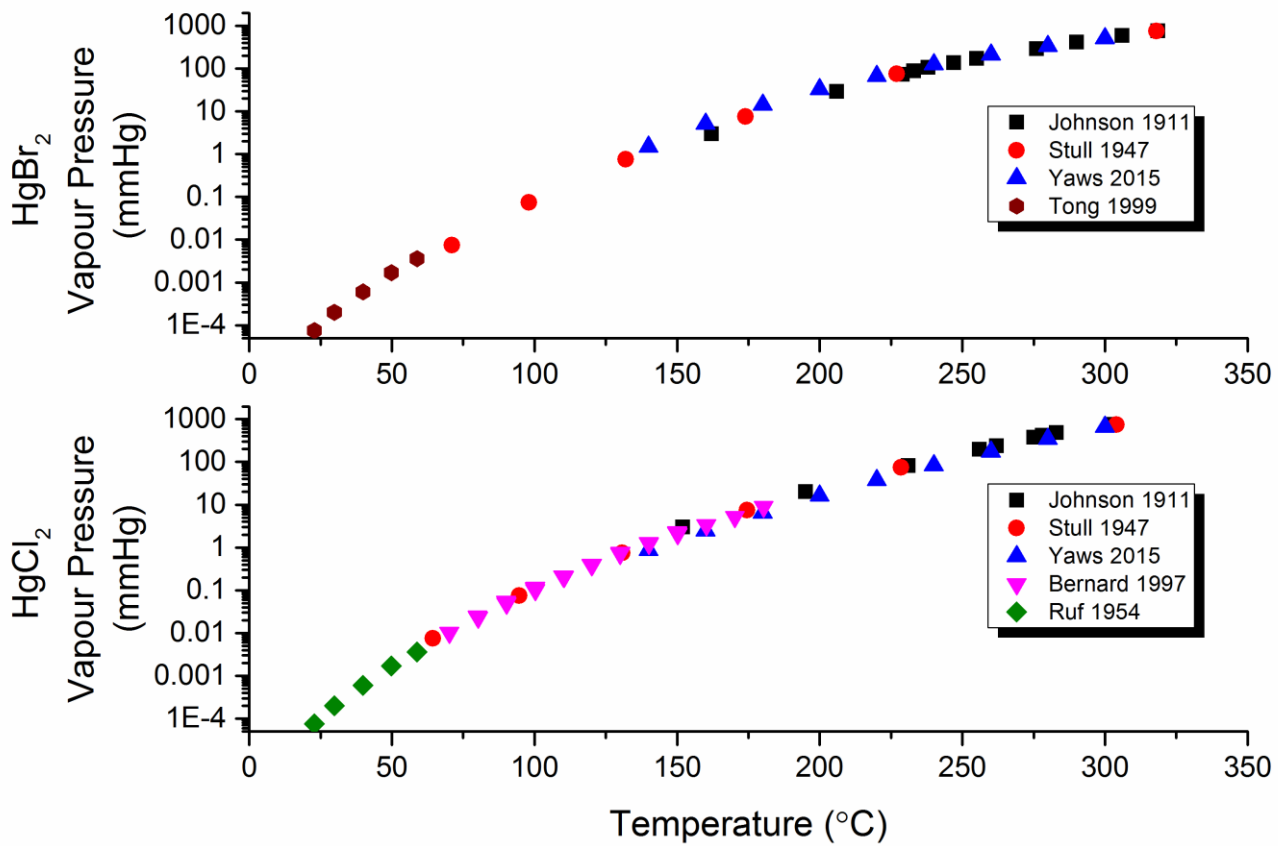

39

40

41 **Figure S4.** The experimental setup for the detection of gaseous and particulate mercuric  
42 halides with concurrent gaseous oxidized mercury and gaseous elemental  
43 mercury measurements

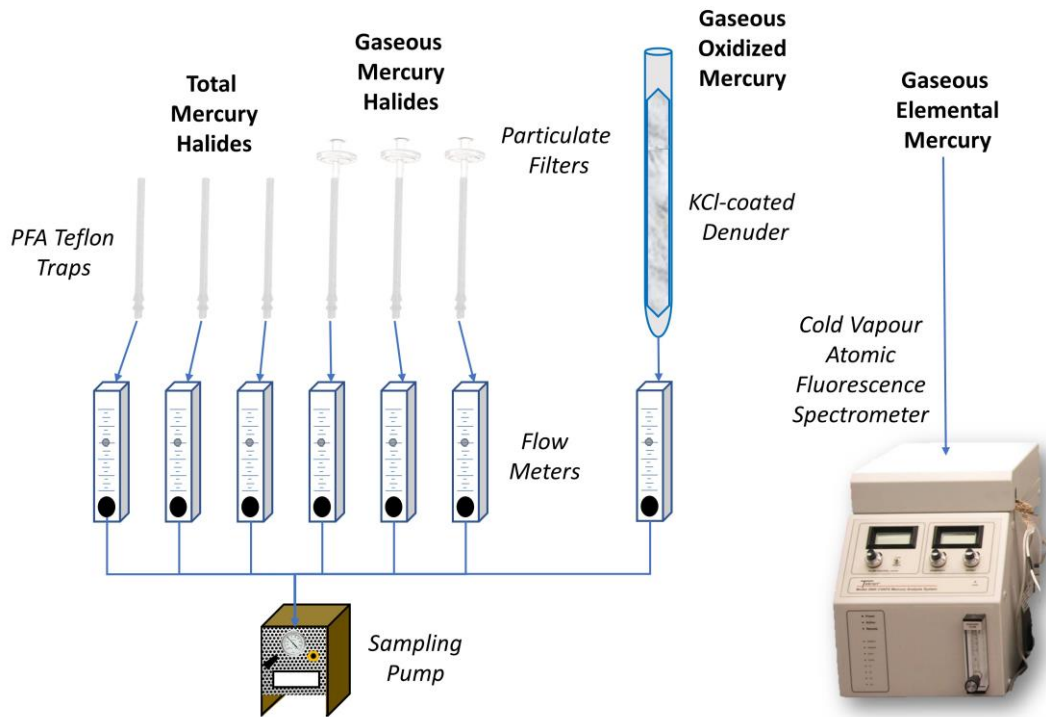

44  
45  
46



47 **S2. References**

- 48 1 Braman, R. S. & Johnson, D. L. Selective absorption tubes and emission technique for determination of  
49 ambient forms of mercury in air. *Environ Sci Technol* **8**, 996-1003 (1974).
- 50 2 Stratton, W. J. & Lindberg, S. E. in *Mercury as a Global Pollutant* (eds Donald B Porcella, John W  
51 Huckabee, & Brian Wheatley) Ch. 144, 1269-1278 (Springer Netherlands, 1995).
- 52 3 Xiao, Z., Sommar, J., Wei, S. & Lindqvist, O. Sampling and determination of gas phase divalent  
53 mercury in the air using a KCl coated denuder. *Fresenius J Anal Chem* **358**, 386-391,  
54 doi:10.1007/s002160050434 (1997).
- 55 4 Tong, X., Barat, R. B. & Poulos, A. T. Detection of Mercuric Bromide in a Gas Phase Flow Cell by  
56 Laser Photofragment Fluorescence Spectroscopy. *Environ Sci Technol* **33**, 3260-3263,  
57 doi:10.1021/es9813461 (1999).
- 58 5 Landis, M. S., Stevens, R. K., Schaedlich, F. & Prestbo, E. M. Development and Characterization of an  
59 Annular Denuder Methodology for the Measurement of Divalent Inorganic Reactive Gaseous Mercury  
60 in Ambient Air. *Environ Sci Technol* **36**, 3000-3009, doi:10.1021/es015887t (2002).
- 61 6 Olson, E., Sharma, R. & Pavlish, J. On the analysis of mercuric nitrate in flue gas by GC-MS. *Anal*  
62 *Bioanal Chem* **374**, 1045-1049, doi:10.1007/s00216-002-1602-6 (2002).
- 63 7 Xiu, G. L. *et al.* Characterization of size-fractionated particulate mercury in Shanghai ambient air.  
64 *Atmospheric Environment* **39**, 419-427, doi:<https://doi.org/10.1016/j.atmosenv.2004.09.046> (2005).
- 65 8 Xiu, G. L. *et al.* Speciated mercury in size-fractionated particles in Shanghai ambient air. *Atmospheric*  
66 *Environment* **43**, 3145-3154, doi:10.1016/j.atmosenv.2008.07.044 (2009).
- 67 9 Lyman, S. N., Gustin, M. S. & Prestbo, E. M. A passive sampler for ambient gaseous oxidized mercury  
68 concentrations. *Atmos Environ* **44**, 246-252, doi:<http://dx.doi.org/10.1016/j.atmosenv.2009.10.008>  
69 (2010).
- 70 10 Huang, J., Miller, M. B., Weiss-Penzias, P. & Gustin, M. S. Comparison of Gaseous Oxidized Hg  
71 Measured by KCl-Coated Denuders, and Nylon and Cation Exchange Membranes. *Environ Sci Technol*  
72 **47**, 7307-7316, doi:10.1021/es4012349 (2013).
- 73 11 Zverina, O., Coufalik, P., Komarek, J., Gadas, P. & Sysalova, J. Mercury associated with size-  
74 fractionated urban particulate matter: three years of sampling in Prague, Czech Republic. *Chem Pap* **68**,  
75 197-202, doi:10.2478/s11696-013-0436-3 (2014).
- 76 12 Deeds, D. A. *et al.* Development of a particle-trap preconcentration-soft ionization mass spectrometric  
77 technique for the quantification of mercury halides in air. *Anal Chem* **87**, 5109-5116,  
78 doi:10.1021/ac504545w (2015).
- 79 13 Jones, C. P., Lyman, S. N., Jaffe, D. A., Allen, T. & O'Neil, T. L. Detection and quantification of gas-  
80 phase oxidized mercury compounds by GC/MS. *Atmos. Meas. Tech.* **9**, 2195-2205, doi:10.5194/amt-9-  
81 2195-2016 (2016).
- 82 14 Johnson, F. THE VAPOR PRESSURES OF MERCURIC CHLORIDE, BROMIDE AND IODIDE. *J*  
83 *Am Chem Soc* **33**, 777-781 (1911).
- 84 15 Stull, D. R. Vapor Pressure of Pure Substances. Organic and Inorganic Compounds. *Industrial &*  
85 *Engineering Chemistry* **39**, 517-540, doi:10.1021/ie50448a022 (1947).
- 86 16 Yaws, C. L. & Satyro, M. A. in *The Yaws Handbook of Vapor Pressure (Second Edition)* 315-322  
87 (Gulf Professional Publishing, 2015).
- 88 17 Bernard, L. *et al.* Détermination de la pression de vapeur de  $\text{HgCl}_2$  par la méthode  
89 d'effusion de Knudsen. *J. Phys. III France* **7**, 311-319 (1997).
- 90 18 Ruf, R. & Treadwell, W. D. Zur Kenntnis des Dampfdrucks von Quecksilber(II)-chlorid. *Helvetica*  
91 *Chimica Acta* **37**, 1941-1948, doi:10.1002/hlca.19540370705 (1954).
